# Supplementary material for: Krox20 hindbrain regulation incorporates multiple modes of cooperation between cis-acting elements
Source: PubMed Central journal article supplement (PMC5549768; doi:10.1371/journal.pgen.1006903), 2017-07-27
Supplement: pgen.1006903.s005.pdf [file pgen.1006903.s005.pdf]

**S1 Table. Sequences of 4C-seq primers including Illumina adaptors**

| Primer names              | Sequences                                                                                                                                                                    |
|---------------------------|------------------------------------------------------------------------------------------------------------------------------------------------------------------------------|
| <i>Krox20</i><br>promoter | Inverse Forward:<br>AATGATACGGCGACCACCGAACACTCTTTCCCTACACGACGCTCT<br>TCCGATCTTCCGTCACTGACTCTCTC<br>Inverse Reverse:<br>CAAGCAGAAGACGGCATAACGAAGATGCACCTGGTCACCA              |
| Element A                 | Inverse Forward:<br>AATGATACGGCGACCACCGAACACTCTTTCCCTACACGACGCTCT<br>TCCGATCTGAGGTAGGGAGAAACAGTAG<br>Inverse Reverse:<br>CAAGCAGAAGACGGCATAACGATGAGTCTTGGCAGCTAATG           |
| Element B                 | Inverse Forward:<br>AATGATACGGCGACCACCGAACACTCTTTCCCTACACGACGCTCT<br>TCCGATCTCTTTGTTCTTTTGCTCAGT<br>Inverse Reverse:<br>CAAGCAGAAGACGGCATAACGAGATGTGACAGAGGTTGAGAG           |
| Element C                 | Inverse Forward:<br>AATGATACGGCGACCACCGAACACTCTTTCCCTACACGACGCTCT<br>CCGATCTATTTGAAAAATGATGTATCACTGAG<br>Inverse Reverse:<br>CAAGCAGAAGACGGCATAACGACTGACAGCCACAGGAAGT        |
| <i>Nrbf2</i><br>promoter  | Inverse Forward:<br>AATGATACGGCGACCACCGAACACTCTTTCCCTACACGACGCTCT<br>TCCGATCTCACATACTAAATAACAAATGCCATAG<br>Inverse Reverse:<br>CAAGCAGAAGACGGCATAACGAAGATTATTATACTCAGCTTGGGA |
